# Supplementary material for: The Effectiveness of School-Based Interventions on Obesity-Related Behaviours in Primary School Children: A Systematic Review and Meta-Analysis of Randomised Controlled Trials
Source: MDPI journal article supplement (doi:10.3390/children8060489), 2021-06-08
Supplement: s1 [file s1]

## Additional File S2

### Additional File S2: Search Strategy

#### MEDLINE

|           |                                                                                  |
|-----------|----------------------------------------------------------------------------------|
| <b>1</b>  | Child/                                                                           |
| <b>2</b>  | minors/                                                                          |
| <b>3</b>  | (child* OR young person OR young people OR minORs OR minOR).mp.                  |
| <b>4</b>  | 1 OR 2 OR 3                                                                      |
| <b>5</b>  | schools/                                                                         |
| <b>6</b>  | education/                                                                       |
| <b>7</b>  | students/                                                                        |
| <b>8</b>  | (school* OR educat* OR classroom OR student*).mp.                                |
| <b>9</b>  | 5 OR 6 OR 7 OR 8                                                                 |
| <b>10</b> | exercise/                                                                        |
| <b>11</b> | sports/                                                                          |
| <b>12</b> | (exercise* OR sport* OR physical activit*).mp.                                   |
| <b>13</b> | 10 OR 11 OR 12                                                                   |
| <b>14</b> | diet/                                                                            |
| <b>15</b> | feeding behavior/                                                                |
| <b>16</b> | eating/                                                                          |
| <b>17</b> | energy intake/                                                                   |
| <b>18</b> | nutritional status/                                                              |
| <b>19</b> | (diet* OR feeding behavio?r OR eat* OR energy intake* OR nutritional status).mp. |
| <b>20</b> | sedentary lifestyle/                                                             |
| <b>21</b> | sedentary.mp.                                                                    |
| <b>22</b> | 20 OR 21                                                                         |
| <b>23</b> | randomized controlled trials as Topic/                                           |
| <b>24</b> | cross-over studies/                                                              |
| <b>25</b> | double-blind method/                                                             |
| <b>26</b> | (randomised OR randomized).mp.                                                   |
| <b>27</b> | 23 OR 24 OR 25 OR 26                                                             |
| <b>28</b> | 14 OR 15 OR 16 OR 17 OR 18 OR 19                                                 |
| <b>29</b> | 13 OR 22 OR 28                                                                   |
| <b>30</b> | 4 AND 9 AND 27 AND 29                                                            |
